# Supplementary material for: Glucomannan-poly(N-vinyl pyrrolidinone) bicomponent hydrogels for wound healing
Source: Royal Society of Chemistry journal article supplement (doi:10.1039/c3tb21640c), 2013-12-06
Supplement: c3tb21640c.pdf [file c3tb21640c.pdf]

### Electronic supporting information

| Hydrogel        | KGM (%)                | Ce(IV) (%) | PNVP (%) | PEGDA wt 2% HMPP (%) | Metabolic activity of cells with hydrogel |                              |
|-----------------|------------------------|------------|----------|----------------------|-------------------------------------------|------------------------------|
|                 |                        |            |          |                      | Fibroblasts (% of control)                | Keratinocytes (% of control) |
| Control         | -                      | -          | -        | -                    | 100±17.1                                  | 100±7.3                      |
| KGM             | 10 mg mL <sup>-1</sup> | -          | -        | -                    | 100±12.8                                  | 97.3±7.5                     |
| Crosslinked KGM | 1                      | 0.001      | -        | -                    | 101.2±22.0                                | 111.7±9.5                    |
|                 | 1                      | 0.0015     | -        | -                    | 79.2±16.7                                 | 102.4±29.5                   |
|                 | 1                      | 0.003      | -        | -                    | 101.1±9                                   | 78.1±17.7                    |
|                 | 1                      | 0.006      | -        | -                    | 98.9±3.5                                  | 85.5±17.8                    |
| Control         | -                      | -          | -        | -                    | 100±17.1                                  | 100±7.2                      |
| KGM             | 10 mg mL <sup>-1</sup> | -          | -        | -                    | 89.5±11.4                                 | 97.2±7.5                     |
| Crosslinked KGM | 0.5                    | 0.001      | -        | -                    | 107.1±27.5                                | 98.9±9.9                     |
|                 | 1                      | 0.001      | -        | -                    | 107.5±17.7                                | 103.3±11.1                   |
|                 | 1.25                   | 0.001      | -        | -                    | 89.9±9.8                                  | 97.3±9.04                    |
|                 | 1.5                    | 0.001      | -        | -                    | 105.1±22.6                                | 101.0±8.06                   |
| Control         | -                      | -          | -        | -                    | 100±8.4                                   | -                            |
| KGM             | 10 mg mL <sup>-1</sup> | -          | -        | -                    | 111.5±3.7                                 | -                            |
| P(NVP-co-PEGDA) | -                      | -          | 40       | 8                    | 82.7±1.6                                  | -                            |
| SemilipN        | 14                     | -          | 40       | 8                    | 118±1.9                                   | -                            |
|                 | 24                     | -          | 40       | 8                    | 94.6±2.7                                  | -                            |
|                 | 35                     | -          | 40       | 8                    | 89.6±4.3                                  | -                            |
| Graft conetwork | 14                     | 0.5        | 40       | 8                    | 105.7±4.9                                 | -                            |
|                 | 14                     | 1          | 40       | 8                    | 90.01±0.9                                 | -                            |
|                 | 24                     | 0.5        | 40       | 8                    | 94.9±3.2                                  | -                            |
|                 | 24                     | 1          | 40       | 8                    | 106.7±6.6                                 | -                            |

ESI Table 1. The effect of placing the hydrogels in indirect contact with fibroblasts and keratinocytes for 3 days. Cell metabolic activity was measured using MTT assay. Results shown are means ± SD (n=3).
